# Supplementary figures and images for: π-Conjugation effect on the aggregation-induced emission of extended viologens
Source: Royal Society of Chemistry journal article supplement (doi:10.1039/d0nj05075j), 2020-12-11

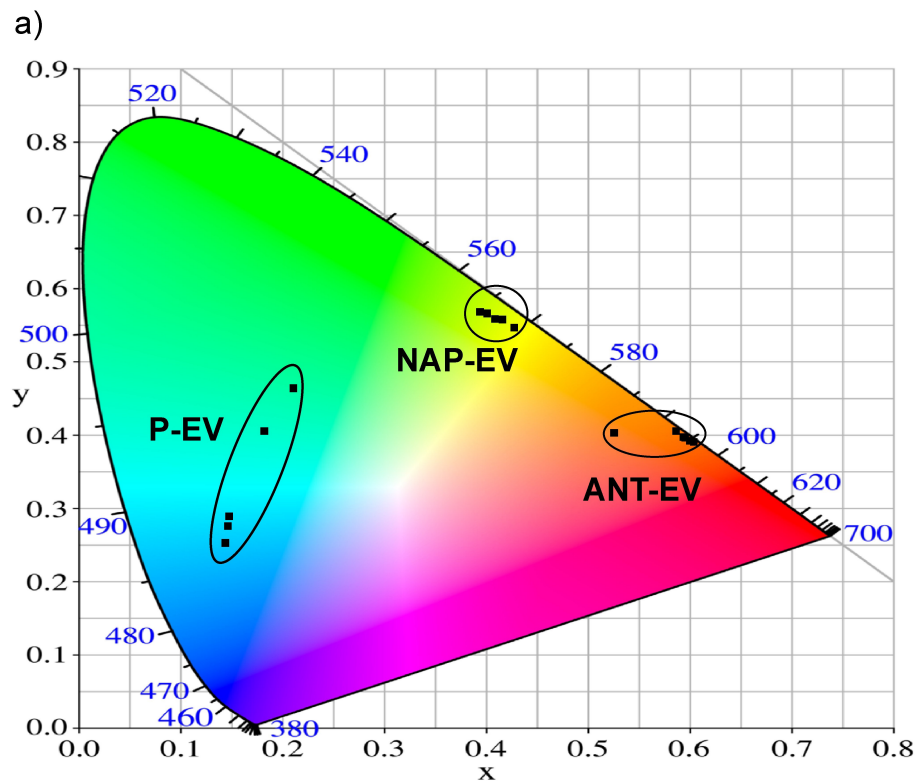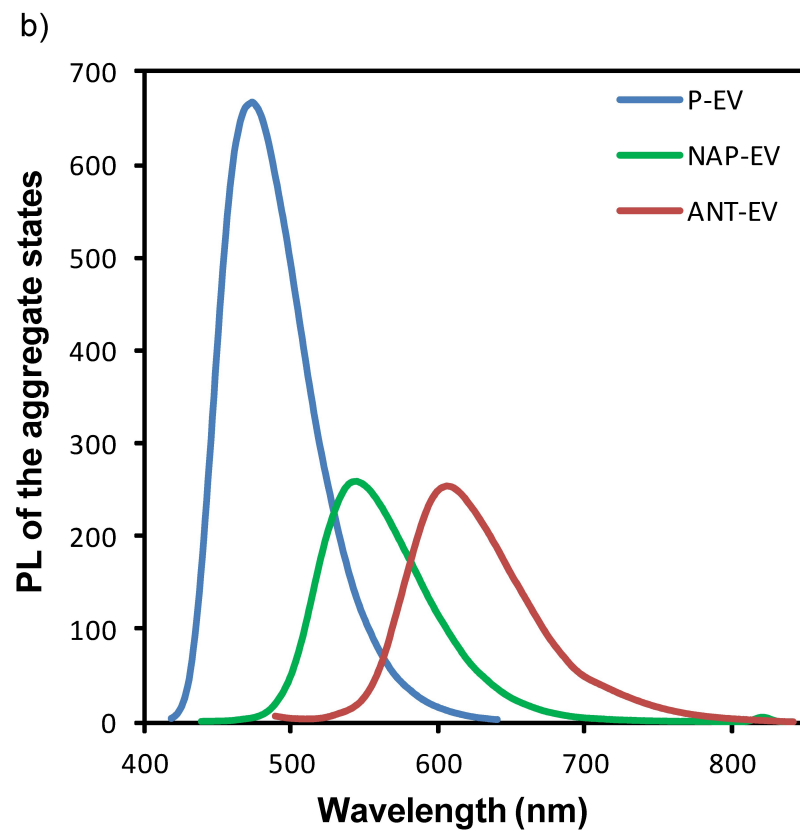

Supplement: d0nj05075j3.pdf [file d0nj05075j3.pdf]
